# Supplementary material for: New insights into culture negative endophthalmitis by unbiased next generation sequencing
Source: PubMed Central journal article supplement (PMC6351655; doi:10.1038/s41598-018-37502-w), 2019-01-29
Supplement: 41598_2018_37502_MOESM3_ESM.pdf [file 41598_2018_37502_MOESM3_ESM.pdf]

## New insights into culture negative endophthalmitis by unbiased next generation sequencing

<sup>1</sup>Dhanshree Deshmukh, <sup>1</sup>Joveeta Joseph\*, <sup>1</sup>Moumita Chakrabarti, <sup>1</sup>Savitri Sharma,

<sup>1</sup>Rajagopalaboopathi Jayasudha, <sup>1</sup>Kalyana C Sama, <sup>1</sup>Bhavani Sontam, <sup>2</sup>Mudit Tyagi, <sup>2</sup>Raja Narayanan,

<sup>1</sup>S Shivaji

<sup>1</sup>Jhaveri Microbiology Centre, Brien Holden Eye Research Centre, L. V. Prasad Eye Institute,

Hyderabad, Telangana, India, <sup>2</sup>Smt. Kannuri Santhamma Centre for vitreoretinal diseases. L V Prasad

Eye Institute

### Supplementary Table 3: Statistical comparison of bacterial genera abundance between culture positive and culture negative endophthalmitis cases

Bacterial genera exhibiting significant (BH corrected  $P < 0.05$ ) differential abundance across culture positive and culture negative endophthalmitis cases

| Genus                    | p value<br>(Wilcoxon test) | BH corrected<br>p value |
|--------------------------|----------------------------|-------------------------|
| <i>Acinetobacter</i>     | 0.353                      | 0.53                    |
| Actinomycetales          | 0.353                      | 0.53                    |
| <i>Bacillus</i>          | 0.165                      | 0.53                    |
| <i>Corynebacterium</i>   | 0.353                      | 0.53                    |
| <i>Brevibacterium</i>    | 0.559                      | 0.789                   |
| Enterobacteriaceae       | 0.203                      | 0.53                    |
| <i>Erwinia</i>           | 0.165                      | 0.53                    |
| <i>Gemella</i>           | 0.638                      | 0.851                   |
| <i>Haemophilus</i>       | 1                          | 1                       |
| <i>Klebsiella</i>        | 0.038                      | 0.344                   |
| <i>Microbacterium</i>    | 1                          | 1                       |
| <i>Micrococcus</i>       | 0.353                      | 0.53                    |
| Moraxellaceae            | 1                          | 1                       |
| <i>Morganella</i>        | 1                          | 1                       |
| Planococcaceae           | 0.97                       | 1                       |
| <i>Pseudomonas</i>       | 1                          | 1                       |
| <i>Serratia</i>          | 0.038                      | 0.344                   |
| <i>Sphingomonas</i>      | 0.3                        | 0.53                    |
| <i>Staphylococcus</i>    | 0.319                      | 0.53                    |
| <i>Streptococcus</i>     | 0.043                      | 0.344                   |
| <i>Williamsia</i>        | 0.096                      | 0.53                    |
| <i>Salmonella</i>        | 0.353                      | 0.53                    |
| <i>Stenoptrophomonas</i> | 0.353                      | 0.53                    |
| Unidentified             | 0.353                      | 0.53                    |
